# Supplementary material
Source: Springer Nature journal article supplement (https://www.springermedizin.de/resource/supplementary/12974_2013_928_MOESM6_ESM.pdf/9600518)

Motor Function T-scores

$r^2 = 0.361$   $P = 0.0024$

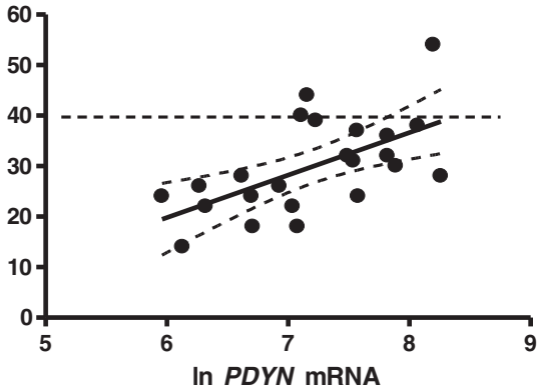

Supplement: MOESM6 [file 9600518]
